# Supplementary material for: Three-dimensional printing of continuous-fiber composites by in-nozzle impregnation
Source: PubMed Central journal article supplement (PMC4786850; doi:10.1038/srep23058), 2016-03-11
Supplement: srep23058-s1.pdf [file srep23058-s1.pdf]

# Three-dimensional printing of continuous-fiber composites by in-nozzle impregnation

Ryosuke Matsuzaki<sup>1,\*</sup>, Masahito Ueda<sup>2,\*</sup>, Masaki Namiki<sup>2</sup>, Tae-Kun Jeong<sup>2</sup>, Hirosuke Asahara<sup>2</sup>, Keisuke Horiguchi<sup>1</sup>, Taishi Nakamura<sup>1</sup>, Akira Todoroki<sup>3</sup>, Yoshiyasu Hirano<sup>4</sup>

<sup>1</sup> Tokyo University of Science, 2641 Yamazaki, Noda, Chiba 278-8510, Japan

<sup>2</sup> Nihon University, 1-8-14 Kanda-surugadai, Chiyoda, Tokyo 101-8308, Japan

<sup>3</sup> Tokyo Institute of Technology, 2-12-1 O-okayama, Meguro, Tokyo 152-8551, Japan

<sup>4</sup> Japan Aerospace Exploration Agency, 6-13-1 Osawa, Mitaka, Tokyo 181-0015, Japan

\* These authors contributed equally to this work.

Correspondence and requests for materials should be addressed to R.M. (email: [rmatsuz@rs.tus.ac.jp](mailto:rmatsuz@rs.tus.ac.jp)) or to M.U. ([ueda@mech.cst.nihon-u.ac.jp](mailto:ueda@mech.cst.nihon-u.ac.jp)) or to A.T. (email: [atodorok@ginza.mes.titech.ac.jp](mailto:atodorok@ginza.mes.titech.ac.jp)).

## Supplementary Information

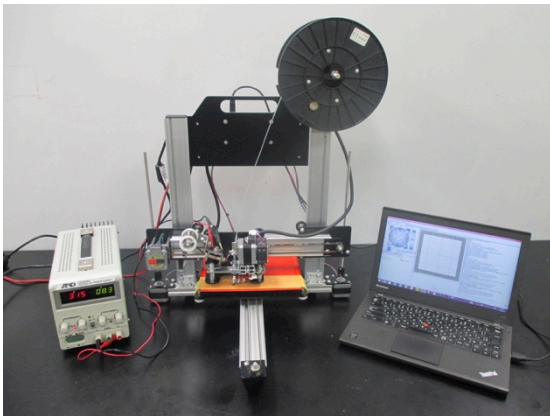

Fig. 1 The 3D printer used for fabricating continuous-fiber composites by in-nozzle impregnation.

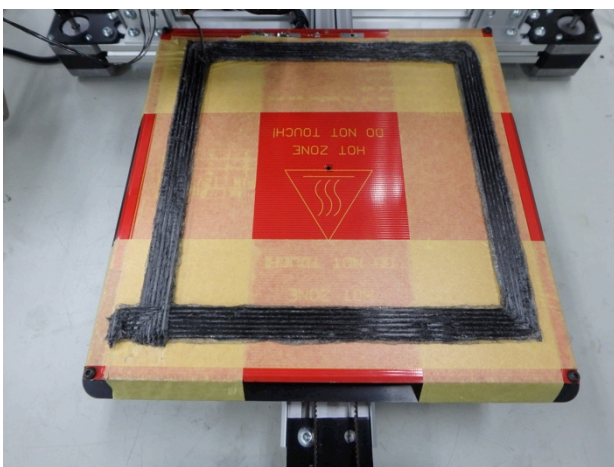

Fig. 2 Specimen fabrication of CFRTPs by 3D printing. Four specimens were sliced from the four sides.

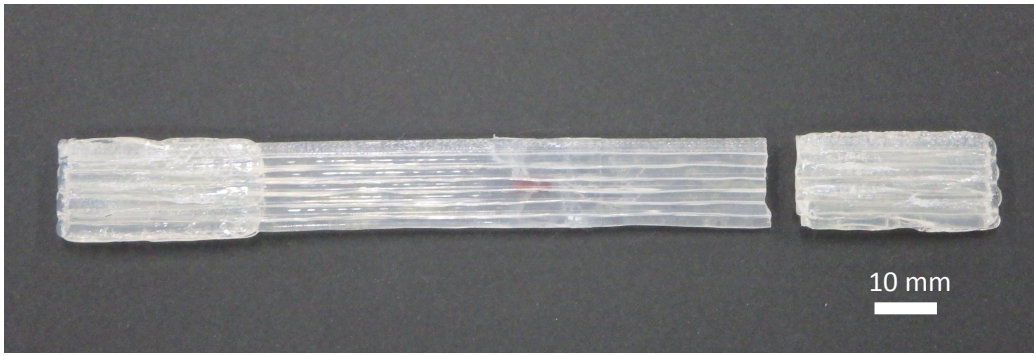

Fig. 3 PLA specimen fabricated by 3D printing after the tensile test.

Table 1. Tensile mechanical properties of materials used for 3D printing and 3D printed specimens.

|                               | Carbon fiber <sup>47</sup> | Jute fiber           | PLA                   | 3D printed specimen        |                            |
|-------------------------------|----------------------------|----------------------|-----------------------|----------------------------|----------------------------|
|                               |                            |                      |                       | CFRTP<br>( $\nu_f=0.066$ ) | JFRTP<br>( $\nu_f=0.061$ ) |
| Tensile modulus [GPa]         | 294                        | 27.4 ( $\pm 7.81$ )  | 3.25 ( $\pm 0.0577$ ) | 19.5 ( $\pm 2.08$ )        | 5.11 ( $\pm 0.410$ )       |
| Tensile strength [MPa]        | 5880                       | 417 ( $\pm 111$ )    | 42.6 ( $\pm 2.62$ )   | 185.2 ( $\pm 24.6$ )       | 57.1 ( $\pm 5.33$ )        |
| Tensile strain-to-failure [%] | 2.0                        | 2.81 ( $\pm 0.324$ ) | 1.45 ( $\pm 0.0945$ ) | 0.95 ( $\pm 0.0873$ )      | 1.81 ( $\pm 0.448$ )       |
